# Supplementary material
Source: PubMed Central journal article supplement (PMC10797280)
Supplement: ocad213_supplementary_data.pdf [file ocad213_supplementary_data.pdf]

**Please note:** The *abstract, author list, contributing NEI Cores* and a list of *Select Agents* used in this research can be found on the final pages.

|                          |                     |                        |                     |
|--------------------------|---------------------|------------------------|---------------------|
| <b>Bizagi Case ID:</b>   | 3645                | <b>Requester Name:</b> | Baber Nathan        |
| <b>Clearance Number:</b> | 3645 - Other - 2023 | <b>Requester Date:</b> | 9/7/2023 9:54:36 AM |

| Manuscript Details                                                                                                                                                     |                                                                                                                                                  |                                        |           |
|------------------------------------------------------------------------------------------------------------------------------------------------------------------------|--------------------------------------------------------------------------------------------------------------------------------------------------|----------------------------------------|-----------|
| <b>NEI Lab:</b>                                                                                                                                                        | Other                                                                                                                                            | <b>Publication to be Submitted to:</b> | JAMIA     |
| <b>Type of publication:</b>                                                                                                                                            | Journal Article / bioRxiv                                                                                                                        | <b>POTS# (Journal):</b>                | 23-000000 |
| <b>Title of publication:</b>                                                                                                                                           | Prediction of Multiclass Surgical Outcomes in Glaucoma Using Multimodal Deep Learning Based on Free-Text Operative Notes and Structured EHR Data |                                        |           |
| <b>Date of Conference:</b>                                                                                                                                             |                                                                                                                                                  |                                        |           |
| I certify that I have included an acknowledgement stating "This research was supported (in part) by the Intramural Research Program of the NIH, Nation Eye Institute": |                                                                                                                                                  |                                        | Yes       |

| Manuscript Questions                                                                                          |    |                 |    |
|---------------------------------------------------------------------------------------------------------------|----|-----------------|----|
| <b>Is this publication or abstract based on a Clinical Study Protocol?:</b>                                   |    | No              |    |
| <b>Clinical Protocol #:</b>                                                                                   |    | <b>Exempt?:</b> | No |
| <b>Is this publication or abstract based on a study using animals?:</b>                                       |    | No              |    |
| <b>Animal Protocol Study # (APS):</b>                                                                         |    |                 |    |
| <b>Is this manuscript or abstract supported by a Cooperative Research and Development Agreement (CRADA)?:</b> |    | No              |    |
| <b>Title of CRADA:</b>                                                                                        |    |                 |    |
| <b>Name of CRADA Partner:</b>                                                                                 |    |                 |    |
| <b>Do you believe there is patentable information in your publication?:</b>                                   |    | No              |    |
| <b>Have you filed an Employee Invention Report?:</b>                                                          |    |                 |    |
| <b>Newsworthy?:</b>                                                                                           | No |                 |    |
| <b>Submitter's Newsworthy Explanation:</b>                                                                    |    |                 |    |
|                                                                                                               |    |                 |    |

| <b>Dual Use Research</b>                                                                                                                            |    |
|-----------------------------------------------------------------------------------------------------------------------------------------------------|----|
| <b>Is there the potential that your research findings, work product(s), processes or results could be readily misused to cause potential harm?:</b> | No |

| <b>Select Agent Research</b>                                                                                                                                                                                                                      |    |
|---------------------------------------------------------------------------------------------------------------------------------------------------------------------------------------------------------------------------------------------------|----|
| <b>Were any select agents or toxins used in the experiments described in this publication?:</b>                                                                                                                                                   | No |
| <b>I attest and affirm that the research described in this manuscript was conducted in compliance with the CDC Select Agent Regulations (412 CFR Part 73) and/or the USDA/APHIS Select Agent Regulation (7 CFR Part 331 and 9 CFR Part 121):.</b> |    |

| <b>Publishing Agreement</b>                                                                                                                                                                                                |     |
|----------------------------------------------------------------------------------------------------------------------------------------------------------------------------------------------------------------------------|-----|
| <b>I attest that I will submit to PubMed Central upon acceptance for publication, unless the journal deposits the final published article directly. (<a href="http://www.nihms.nih.gov">http://www.nihms.nih.gov</a>):</b> |     |
| <b>Have all authors reviewed the submitted publication or meeting abstract and accepted the content and the authorship?:</b>                                                                                               | Yes |
| <b>Author Review Explanation:</b>                                                                                                                                                                                          |     |

| <b>Statement of Certification</b>                                                                                                                                                          |     |
|--------------------------------------------------------------------------------------------------------------------------------------------------------------------------------------------|-----|
| <b>A copy of this approval form will be sent to the lead NEI Senior Author(s) and the Corresponding Author. Submitter certifies this information is correct on behalf of the authors.:</b> | Yes |

| DSD Review                            |         |
|---------------------------------------|---------|
| Review Decision:                      | Approve |
| DSD Review Comments:                  |         |
|                                       |         |
| Notify Communications Office:         |         |
| Explanation to Communications Office: |         |
|                                       |         |

| Case History             |         |                         |                   |          |
|--------------------------|---------|-------------------------|-------------------|----------|
| Task Name                | Action  | Date of Action          | Performer         | Comments |
| New Manuscript Clearance |         | 9/7/2023<br>10:36:06 AM | Baber Nathan      |          |
| DSD Review               | Approve | 9/7/2023<br>10:37:08 AM | William O'Donnell |          |

**Abstract:**

**Objective:** Surgical outcome prediction is challenging but necessary for postoperative management. Current machine learning models utilize pre- and post-op data, excluding intraoperative information in surgical notes. Current models also usually predict binary outcomes even when surgeries have multiple outcomes that require different postoperative management. This study addresses these gaps by incorporating intraoperative information into multimodal models for multiclass glaucoma surgery outcome prediction.

**Materials and Methods:** We developed and evaluated multimodal deep learning models for multiclass glaucoma trabeculectomy surgery outcomes using both structured EHR data and free-text operative notes. We compare those to baseline models that use structured EHR data exclusively, or neural network models that leverage only operative notes.

**Results:** The multimodal neural network had the highest performance with a macro AUROC of 0.750 and F1 score of 0.583. It outperformed the baseline machine learning model with structured EHR data alone (macro AUROC of 0.712 and F1 score of 0.486). Additionally, the multimodal model achieved the highest recall (0.692) for hypotony surgical failure, while the surgical success group had the highest precision (0.884) and F1 score (0.775).

**Discussion:** This study shows that operative notes are an important source of predictive information. The multimodal predictive model combining perioperative notes and structured pre-op and post-op EHR data outperformed other models. Multiclass surgical outcome prediction can provide valuable insights for clinical decision-making.

**Conclusions:** Our results show the potential of deep learning models to enhance clinical decision-making for postoperative management. They can be applied to other specialties to improve surgical outcome predictions.

| <b>Author</b>       | <b>IC or Organization</b>                                             | <b>Senior NEI Author</b> | <b>Corresponding Author</b> | <b>Author's Email</b>  |
|---------------------|-----------------------------------------------------------------------|--------------------------|-----------------------------|------------------------|
| Chiang, Michael F.  | National Eye Institute                                                | Yes                      | No                          | michael.chiang@nih.gov |
| Hribar, Michelle    | Oregon Health and Science University and National Eye Institute (NEI) |                          | Yes                         | hribarm@ohsu.edu       |
| Lin, Wei-Chun       | Oregon Health and Science University                                  |                          | No                          |                        |
| Song, Xubo          | Oregon Health and Science University                                  |                          | No                          |                        |
| Chen, Aiyin         | Oregon Health and Science University                                  |                          | No                          |                        |
| Weiskopf, Nicole G. | Oregon Health and Science University                                  |                          | No                          |                        |

|       |
|-------|
| CORES |
|       |

| <b>Select Agent or Toxin</b> | <b>Stored at NIH</b> | <b>Used at NIH</b> |
|------------------------------|----------------------|--------------------|
|                              |                      |                    |
